# Supplementary material for: Factors Associated with Shooting Accuracy and Wounding Rate of Four Managed Wild Deer Species in the UK, Based on Anonymous Field Records from Deer Stalkers
Source: PubMed Central journal article supplement (PMC4198128; doi:10.1371/journal.pone.0109698), 2014-10-15
Supplement: pone.0109698.s001.pdf [file pone.0109698.s001.pdf]

**Table S1.** Statistical significance (based on Wald statistics) of the interactions between deer species and the explanatory variables in Table 1 when modelling the probability that a shot hit its target, and the probability that a shot that hit its target killed the animal.

| Variable            | Probability of hit from |    |       | Probability of kill |    |       |
|---------------------|-------------------------|----|-------|---------------------|----|-------|
|                     | first shot              |    |       | when first shot hit |    |       |
|                     | Wald                    | df | P     | Wald                | df | P     |
| Stalker age         | 7.43                    | 11 | 0.763 | 2.18                | 11 | 0.998 |
| Years of experience | 4.06                    | 8  | 0.852 | 3.64                | 8  | 0.888 |
| Deer shot per year  | 6.42                    | 8  | 0.600 | 6.50                | 8  | 0.591 |
| Qualification       | 6.58                    | 12 | 0.884 | 7.65                | 12 | 0.812 |
| Zero check          | 2.60                    | 10 | 0.989 | 1.00                | 10 | 1.000 |
| Shooting practice   | 4.09                    | 11 | 0.967 | 3.27                | 11 | 0.987 |
| Rifle calibre       | 1.64                    | 9  | 0.996 | 2.45                | 9  | 0.982 |
| Bullet weight       | 0.24                    | 14 | 0.999 | 3.89                | 14 | 0.996 |
| Muzzle energy       | 1.86                    | 17 | 0.999 | 7.75                | 16 | 0.956 |
| Shooting position   | 5.85                    | 12 | 0.924 | 9.66                | 12 | 0.646 |
| Use of rest         | 10.16                   | 24 | 0.994 | 13.57               | 24 | 0.956 |
| Comfort             | 2.69                    | 4  | 0.611 | 0.97                | 4  | 0.915 |
| Time available      | 4.71                    | 12 | 0.967 | 8.09                | 12 | 0.778 |
| Point of aim        | 6.49                    | 12 | 0.889 | 13.41               | 12 | 0.340 |
| Distance to target  | 4.95                    | 4  | 0.292 | 2.24                | 4  | 0.691 |
| Light               | 7.44                    | 18 | 0.986 | 11.45               | 17 | 0.832 |
| Weather             | 2.48                    | 12 | 0.998 | 8.49                | 12 | 0.745 |

|                   |       |    |       |       |    |       |
|-------------------|-------|----|-------|-------|----|-------|
| Wind strength     | 2.54  | 12 | 0.998 | 5.41  | 12 | 0.943 |
| Wind angle        | 2.34  | 17 | 0.999 | 8.40  | 16 | 0.936 |
| Known area        | 9.22  | 17 | 0.933 | 5.76  | 16 | 0.990 |
| Habitat type      | 5.99  | 20 | 0.999 | 12.53 | 20 | 0.897 |
| Ground vegetation | 5.48  | 20 | 0.999 | 5.82  | 20 | 0.999 |
| Concealment       | 2.06  | 8  | 0.979 | 7.19  | 8  | 0.517 |
| Deer sex          | 7.63  | 4  | 0.106 | 4.47  | 4  | 0.347 |
| Deer age          | 5.31  | 12 | 0.947 | 8.86  | 12 | 0.715 |
| Alone or group    | 4.96  | 10 | 0.894 | 14.04 | 10 | 0.171 |
| Alert state       | 15.78 | 20 | 0.730 | 15.06 | 20 | 0.773 |
| Deer orientation  | 8.59  | 12 | 0.737 | 9.67  | 12 | 0.644 |
