# Supplementary material for: Factors Associated with Shooting Accuracy and Wounding Rate of Four Managed Wild Deer Species in the UK, Based on Anonymous Field Records from Deer Stalkers
Source: PubMed Central journal article supplement (PMC4198128; doi:10.1371/journal.pone.0109698), 2014-10-15
Supplement: pone.0109698.s002.pdf [file pone.0109698.s002.pdf]

**Table S2.** Variance inflation factors (VIFs) for the explanatory variables in Table 1 when modelling the probability that a shot hit its target, and the probability that a shot that hit its target killed the animal. Categorical variables have one VIF per category, so the minimum and maximum VIFs are given to show the range.

| <b>Variable</b>     | <b>Probability of hit from first shot</b> | <b>Probability of kill when first shot hit</b> |
|---------------------|-------------------------------------------|------------------------------------------------|
| Stalker age         | 1.80-2.23                                 | 1.81-2.22                                      |
| Years of experience | 2.15-2.57                                 | 2.16-2.59                                      |
| Deer shot per year  | 1.85-2.50                                 | 1.82-2.53                                      |
| Qualification       | 3.86-5.24                                 | 3.83-5.16                                      |
| Zero check          | 1.49-2.59                                 | 1.51-2.60                                      |
| Shooting practice   | 1.83-2.20                                 | 1.81-2.21                                      |
| Rifle calibre       | 24.79-27.59                               | 25.34-28.22                                    |
| Bullet weight       | 2.12-34.73                                | 2.13-31.57                                     |
| Muzzle energy       | 1.72-32.00                                | 1.73-28.97                                     |
| Shooting position   | 4.53-8.67                                 | 4.37-8.64                                      |
| Use of rest         | 1.48-5.68                                 | 1.49-5.70                                      |
| Comfort             | 1.19-1.19                                 | 1.18-1.18                                      |
| Time available      | 2.19-2.69                                 | 2.25-2.75                                      |
| Point of aim        | 1.20-1.38                                 | 1.20-1.38                                      |
| Distance to target  | 1.71                                      | 1.71                                           |
| Light               | 1.15-1.61                                 | 1.15-1.60                                      |
| Weather             | 1.07-1.19                                 | 1.07-1.19                                      |

|                   |           |           |
|-------------------|-----------|-----------|
| Wind strength     | 1.10-1.15 | 1.10-1.16 |
| Wind angle        | 1.28-3.45 | 1.29-3.45 |
| Known area        | 2.25-5.29 | 2.43-5.27 |
| Habitat type      | 3.11-4.91 | 3.10-4.92 |
| Ground vegetation | 1.25-1.79 | 1.25-1.79 |
| Concealment       | 5.86-6.46 | 6.27-6.85 |
| Deer species      | 1.65-2.96 | 1.66-2.95 |
| Deer sex          | 1.21-1.21 | 1.21-1.21 |
| Deer age          | 1.18-1.37 | 1.18-1.38 |
| Alone or group    | 1.53-1.62 | 1.53-1.62 |
| Alert state       | 1.42-3.86 | 1.41-3.93 |
| Deer orientation  | 3.07-5.47 | 3.06-5.43 |
